# Supplementary material for: The Functional Association of ACQOS/VICTR with Salt Stress Resistance in Arabidopsis thaliana Was Confirmed by CRISPR-Mediated Mutagenesis
Source: MDPI journal article supplement (doi:10.3390/ijms222111389), 2021-10-21
Supplement: s1 [file s1]

Table S1. Primer list used in this study

T-DNA detection PCR

| Primer name   | SEQ(5'-3')            |
|---------------|-----------------------|
| Basta_FP      | TCAGATTTCCGGTGACGGGCA |
| Basta_RP      | ATGAGCCCAGAACGACGC    |
| Cas9_center_F | GAAGATCGAGAAGATCCTGA  |
| Cas9_center_R | GAAGTCCTTGTCTTCTGATGA |

Amplicon deep sequencing

| Primer name              | SEQ(5'-3')                                              |
|--------------------------|---------------------------------------------------------|
| SG75_F for G1 nested PCR | TTGTTTGGGTAAATAATCATCGTTT                               |
| SG76_R for G1 nested PCR | CACCCAGTACTCCTTTTTTCTT                                  |
| SG77_F for G2 nested PCR | CATTATTAGATACATCTTGAAATAAAATTG                          |
| SG78_R for G2 nested PCR | CACCCAGTACTCCTTTTTTCTC                                  |
| SG139 for G1 2nd PCR     | ACACTCTTTCCCTACACGACGCTCTTCCGATCTGGTATATGGGGTTCCTCGGG   |
| SG140 for G1 2nd PCR     | GTGACTGGAGTTCAGACGTGTGCTCTTCCGATCTTCTTTTTTCCCCAAATTTCCG |
| SG141 for G2 2nd PCR     | ACACTCTTTCCCTACACGACGCTCTTCCGATCTTAGCAAATTCATAGACAGAGC  |
| SG142 for G2 2nd PCR     | GTGACTGGAGTTCAGACGTGTGCTCTTCCGATCTTGATGAGAGTTTTCTGGTGC  |
