# Supplementary material for: The Functional Association of ACQOS/VICTR with Salt Stress Resistance in Arabidopsis thaliana Was Confirmed by CRISPR-Mediated Mutagenesis
Source: MDPI journal article supplement (doi:10.3390/ijms222111389), 2021-10-21
Supplement: s1 [file s1]

Table S2. Mutation efficiencies by amplicon deep sequencing.

| T1 generation |               |          |                 |        |               |          |                 |
|---------------|---------------|----------|-----------------|--------|---------------|----------|-----------------|
| Sample        | AT5G46510(G1) |          |                 | Sample | AT5G46520(G2) |          |                 |
|               | Total read    | Mutation | Indel ratio (%) |        | Toltal read   | Mutation | Indel ratio (%) |
| Col-0         | 21793         | 0        | 0               | Col-0  | 25657         | 2        | 0               |
| S-1           | 20912         | 546      | 2.6             | S-1    | 22218         | 649      | 2.9             |
| S-2           | 18000         | 202      | 1.1             | S-2    | 23448         | 2771     | 11.8            |
| S-3           | 18747         | 120      | 0.6             | S-3    | 24921         | 261      | 1               |
| S-4           | 26946         | 689      | 2.6             | S-4    | 21651         | 664      | 3.1             |
| S-5           | 15133         | 279      | 1.8             | S-5    | 22213         | 577      | 2.6             |
| S-6           | 22235         | 207      | 0.9             | S-6    | 19640         | 288      | 1.5             |
| S-7           | 21894         | 596      | 2.7             | S-7    | 19290         | 549      | 2.8             |
| S-8           | 22717         | 576      | 2.5             | S-8    | 33372         | 932      | 2.8             |
| S-9           | 25653         | 160      | 0.6             | S-9    | 34756         | 262      | 0.8             |
| S-10          | 30200         | 30030    | 99.4            | S-10   | 27419         | 27287    | 99.5            |
| S-11          | 30202         | 533      | 1.8             | S-11   | 27742         | 655      | 2.4             |
| S-12          | 25415         | 1216     | 4.8             | S-12   | 34671         | 2062     | 5.9             |

**T2  
generation**

| Sample | AT5G46510(G1) |          |                    | Sample | AT5G46520(G2) |          |                    | T-DNA<br>detection |
|--------|---------------|----------|--------------------|--------|---------------|----------|--------------------|--------------------|
|        | Total read    | Mutation | Indel<br>ratio (%) |        | Toltal read   | Mutation | Indel<br>ratio (%) |                    |
| 1      | 11718         | 32       | 0.27               | 1      | 7781          | 0        | 0.00               | -                  |
| 2      | 13162         | 11411    | 86.70              | 2      | 15907         | 12616    | 79.31              | +                  |
| 3      | 13314         | 79       | 0.59               | 3      | 4841          | 2266     | 46.81              | -                  |
| 4      | 16019         | 34       | 0.21               | 4      | 11329         | 13       | 0.11               | -                  |
| 5      | 16289         | 16134    | 99.05              | 5      | 14310         | 14295    | 99.90              | +                  |
| 6      | 19368         | 77       | 0.40               | 6      | 16638         | 7570     | 45.50              | -                  |
| 7      | 15000         | 14953    | 99.69              | 7      | 14099         | 14082    | 99.88              | +                  |
| 8      | 11777         | 9455     | 80.28              | 8      | 8507          | 3279     | 38.54              | +                  |
| 9      | 16934         | 9        | 0.05               | 9      | 13528         | 7        | 0.05               | -                  |
| 10     | 16607         | 16333    | 98.35              | 10     | 11139         | 11071    | 99.39              | +                  |
| 11     | 17445         | 17426    | 99.89              | 11     | 14091         | 14080    | 99.92              | +                  |
| 12     | 16189         | 16175    | 99.91              | 12     | 10515         | 10506    | 99.91              | +                  |
| 13     | 14413         | 14386    | 99.81              | 13     | 17624         | 17451    | 99.02              | +                  |
| 14     | 14095         | 13857    | 98.31              | 14     | 13332         | 13319    | 99.90              | +                  |
| 15     | 16188         | 15558    | 96.11              | 15     | 14958         | 14548    | 97.26              | +                  |
| 16     | 12315         | 12310    | 99.96              | 16     | 12034         | 12012    | 99.82              | +                  |
| 17     | 8917          | 8909     | 99.91              | 17     | 13033         | 12907    | 99.03              | +                  |
| 18     | 13500         | 12948    | 95.91              | 18     | 15299         | 15062    | 98.45              | +                  |
| 19     | 11376         | 7683     | 67.54              | 19     | 11737         | 9406     | 80.14              | +                  |
| 20     | 11759         | 9513     | 80.90              | 20     | 12808         | 8131     | 63.48              | +                  |
| 21     | 10010         | 10002    | 99.92              | 21     | 14444         | 14435    | 99.94              | +                  |

|    |       |       |        |    |       |       |       |   |
|----|-------|-------|--------|----|-------|-------|-------|---|
| 22 | 15025 | 26    | 0.17   | 22 | 16344 | 7     | 0.04  | - |
| 23 | 10290 | 5     | 0.05   | 23 | 14131 | 5     | 0.04  | - |
| 24 | 6323  | 6273  | 99.21  | 24 | 12057 | 11973 | 99.30 | + |
| 25 | 11021 | 11017 | 99.96  | 25 | 16199 | 16109 | 99.44 | + |
| 26 | 7910  | 7910  | 100.00 | 26 | 16779 | 16710 | 99.59 | + |
| 27 | 17122 | 17090 | 99.81  | 27 | 16170 | 16044 | 99.22 | + |
| 28 | 16177 | 14028 | 86.72  | 28 | 14095 | 12868 | 91.29 | + |
| 29 | 15344 | 15325 | 99.88  | 29 | 15822 | 15808 | 99.91 | + |
| 30 | 14463 | 9202  | 63.62  | 30 | 18400 | 372   | 2.02  | - |
| 31 | 16461 | 10    | 0.06   | 31 | 10991 | 116   | 1.06  | - |
| 32 | 12163 | 7     | 0.06   | 32 | 10370 | 73    | 0.70  | - |
| 33 | 15022 | 14451 | 96.20  | 33 | 12755 | 11316 | 88.72 | + |
| 34 | 9210  | 9203  | 99.92  | 34 | 8942  | 8940  | 99.98 | + |
| 35 | 13673 | 13542 | 99.04  | 35 | 8533  | 8529  | 99.95 | + |
| 36 | 11434 | 11421 | 99.89  | 36 | 15606 | 15581 | 99.84 | + |
| 37 | 13865 | 13856 | 99.94  | 37 | 10474 | 10446 | 99.73 | + |
| 38 | 15465 | 15367 | 99.37  | 38 | 13230 | 13120 | 99.17 | + |

**T3  
generation**

| Sample | AT5G46510(G1) |          |                    | Sample | AT5G46520(G2) |          |                    | T-DNA<br>detection | in/del in G1 | in/del in G2 |
|--------|---------------|----------|--------------------|--------|---------------|----------|--------------------|--------------------|--------------|--------------|
|        | Total read    | Mutation | Indel<br>ratio (%) |        | Toltal read   | Mutation | Indel<br>ratio (%) |                    |              |              |
| 6-01   | 2270          | 0        | 0                  | 6-01   | 6413          | 6403     | 99.8               | -                  |              | ins. A       |
| 6-02   | 2756          | 3        | 0.1                | 6-02   | 6632          | 6        | 0.1                | -                  |              |              |
| 6-03   | 2284          | 2        | 0.1                | 6-03   | 6721          | 6719     | 100                | -                  |              | ins. A       |
| 6-04   | 1984          | 0        | 0                  | 6-04   | 5729          | 2974     | 51.9               | -                  |              |              |
| 6-05   | 2798          | 4        | 0.1                | 6-05   | 5270          | 5263     | 99.9               | -                  |              | ins. A       |
| 6-06   | 2534          | 2        | 0.1                | 6-06   | 5406          | 2610     | 48.3               | -                  |              |              |
| 6-07   | 2536          | 0        | 0                  | 6-07   | 4670          | 2324     | 49.8               | -                  |              |              |
| 6-08   | 2130          | 3        | 0.1                | 6-08   | 5250          | 2676     | 51                 | -                  |              |              |
| 6-09   | 2738          | 0        | 0                  | 6-09   | 5553          | 10       | 0.2                | -                  |              |              |
| 6-10   | 3217          | 0        | 0                  | 6-10   | 5633          | 10       | 0.2                | -                  |              |              |
| 6-11   | 2532          | 0        | 0                  | 6-11   | 5451          | 10       | 0.2                | -                  |              |              |
| 6-12   | 2444          | 0        | 0                  | 6-12   | 5101          | 5091     | 99.8               | -                  |              | ins. A       |
|        |               |          |                    |        |               |          |                    |                    |              |              |
| 7-01   | 2427          | 2427     | 100                | 7-01   | 5867          | 5865     | 100                | +                  | ins. T       | ins. T       |
| 7-02   | 2097          | 2097     | 100                | 7-02   | 6043          | 6028     | 99.8               | +                  |              |              |
| 7-03   | 2389          | 2389     | 100                | 7-03   | 5838          | 5835     | 99.9               | +                  | ins. T       | ins. A       |
| 7-04   | 1963          | 1963     | 100                | 7-04   | 5714          | 5706     | 99.9               | +                  | ins. A       | ins. A       |
| 7-05   | 2271          | 2271     | 100                | 7-05   | 6502          | 6502     | 100                | +                  | ins. T       | ins. T       |
| 7-06   | 2769          | 2767     | 99.9               | 7-06   | 1736          | 1734     | 99.9               | +                  | ins. T       |              |
| 7-07   | 2208          | 2208     | 100                | 7-07   | 6008          | 5998     | 99.8               | +                  | ins. T       | ins. T       |
| 7-08   | 2095          | 2095     | 100                | 7-08   | 5413          | 4260     | 78.7               | +                  | ins. T       |              |
| 7-09   | 2221          | 2221     | 100                | 7-09   | 5904          | 5447     | 92.3               | +                  | ins. T       |              |
| 7-10   | 2160          | 2160     | 100                | 7-10   | 6361          | 6359     | 100                | +                  | ins. T       |              |
| 7-11   | 1999          | 1999     | 100                | 7-11   | 5872          | 5872     | 100                | +                  | ins. T       | ins. A       |

|       |      |      |      |       |      |      |      |   |        |        |
|-------|------|------|------|-------|------|------|------|---|--------|--------|
| 7-12  | 1782 | 1782 | 100  | 7-12  | 6095 | 6087 | 99.9 | + | ins. T | ins. A |
|       |      |      |      |       |      |      |      |   |        |        |
| 12-01 | 2242 | 2242 | 100  | 12-01 | 6948 | 6944 | 99.9 | + | ins. A | ins. A |
| 12-02 | 2635 | 2635 | 100  | 12-02 | 6399 | 6395 | 99.9 | + |        |        |
| 12-03 | 2142 | 2142 | 100  | 12-03 | 6989 | 6987 | 100  | + | ins. A | ins. A |
| 12-04 | 1961 | 1961 | 100  | 12-04 | 5794 | 5791 | 99.9 | + | ins. T |        |
| 12-05 | 2067 | 2067 | 100  | 12-05 | 5667 | 5667 | 100  | + |        |        |
| 12-06 | 1994 | 1994 | 100  | 12-06 | 5943 | 5941 | 100  | + |        |        |
| 12-07 | 2153 | 2153 | 100  | 12-07 | 5511 | 5509 | 100  | - | ins. T | del. C |
| 12-08 | 1760 | 1760 | 100  | 12-08 | 5878 | 5874 | 99.9 | + |        |        |
| 12-09 | 2175 | 2175 | 100  | 12-09 | 5956 | 5954 | 100  | + |        | del. C |
| 12-10 | 2792 | 2792 | 100  | 12-10 | 2812 | 2812 | 100  | + | ins. G |        |
| 12-11 | 2058 | 2058 | 100  | 12-11 | 1154 | 1150 | 99.7 | + | ins. A | ins. A |
| 12-12 | 1788 | 1785 | 99.8 | 12-12 | 3527 | 3514 | 99.6 | + |        |        |
|       |      |      |      |       |      |      |      |   |        |        |
| 30-01 | 2807 | 1372 | 48.9 | 30-01 | 5416 | 2    | 0    | - |        |        |
| 30-02 | 2527 | 2527 | 100  | 30-02 | 5932 | 2    | 0    | - | ins. A |        |
| 30-03 | 2628 | 2626 | 99.9 | 30-03 | 5461 | 0    | 0    | - | ins. A |        |
| 30-04 | 2198 | 1175 | 53.5 | 30-04 | 5531 | 0    | 0    | + |        |        |
| 30-05 | 2869 | 2869 | 100  | 30-05 | 5617 | 0    | 0    | - | ins. A |        |
| 30-06 | 3241 | 1724 | 53.2 | 30-06 | 6129 | 0    | 0    | - |        |        |
| 30-07 | 2522 | 1334 | 52.9 | 30-07 | 5438 | 0    | 0    | - |        |        |
| 30-08 | 2186 | 1170 | 53.5 | 30-08 | 5411 | 0    | 0    | - |        |        |
| 30-09 | 1916 | 1914 | 99.9 | 30-09 | 4681 | 0    | 0    | - | ins. A |        |
| 30-10 | 1627 | 0    | 0    | 30-10 | 4830 | 0    | 0    | - |        |        |
| 30-11 | 1739 | 1739 | 100  | 30-11 | 4705 | 0    | 0    | - | ins. A |        |
| 30-12 | 1476 | 1476 | 100  | 30-12 | 5142 | 0    | 0    | - |        |        |
|       |      |      |      |       |      |      |      |   |        |        |
| Col-0 | 1905 | 2    | 0.1  | Col-0 | 4874 | 2    | 0    | - |        |        |
