# Supplementary material for: The Functional Association of ACQOS/VICTR with Salt Stress Resistance in Arabidopsis thaliana Was Confirmed by CRISPR-Mediated Mutagenesis
Source: MDPI journal article supplement (doi:10.3390/ijms222111389), 2021-10-21
Supplement: s1 [file s1]

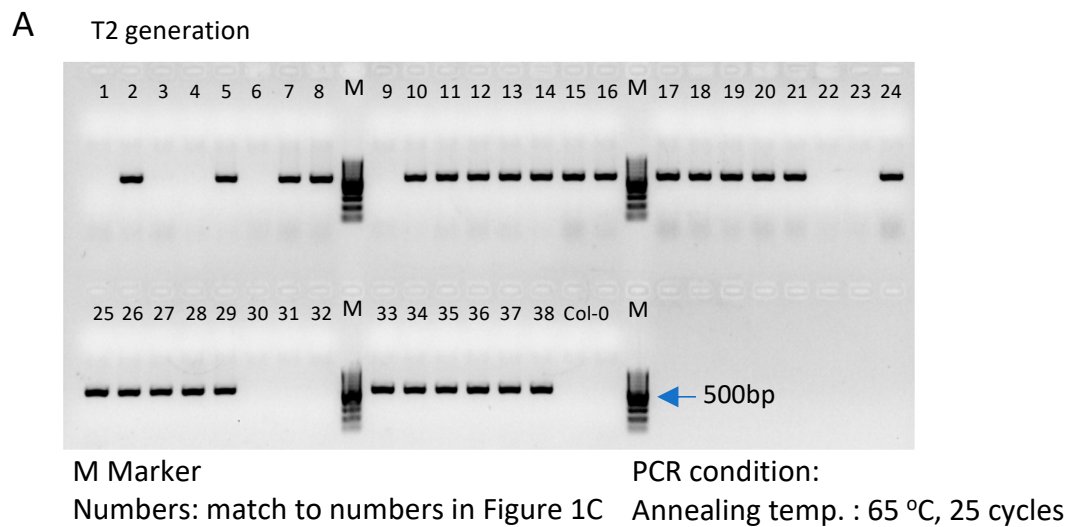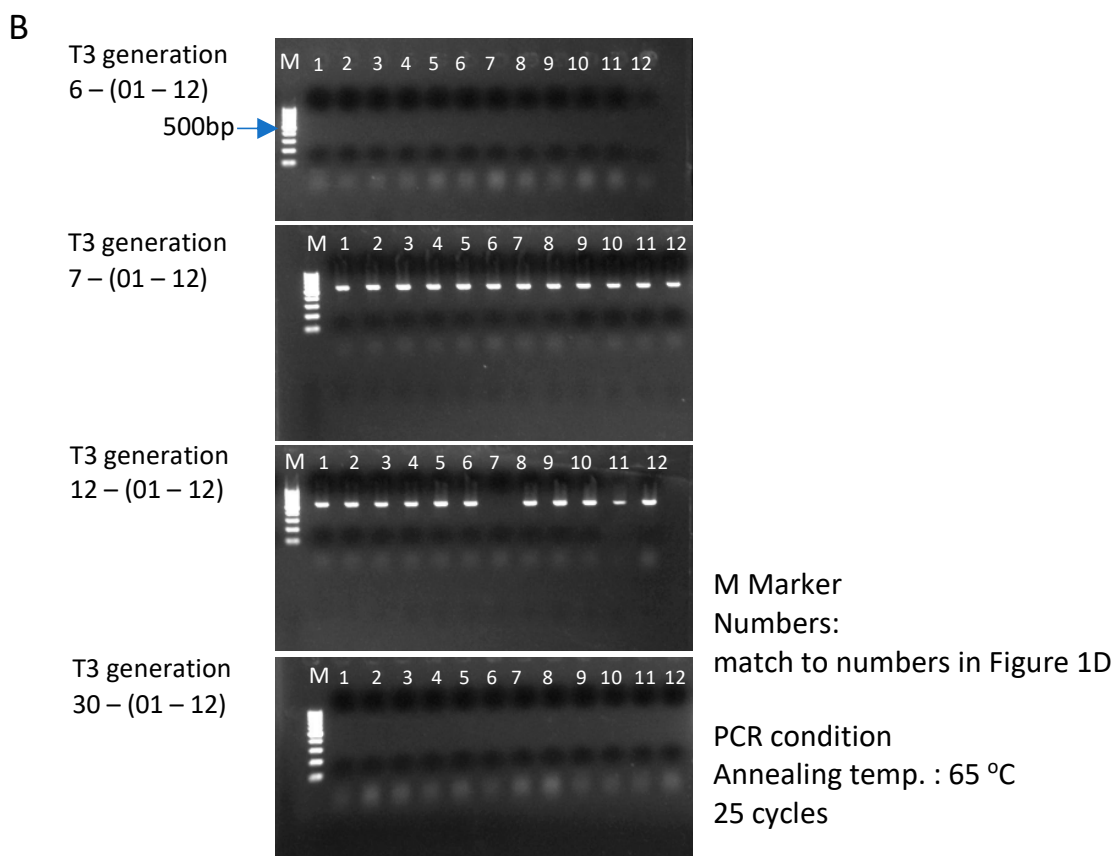

Figure S1. Electrophoresis of PCR product amplified with primers for T-DNA detection in T2 and T3 generation plants. We amplified the herbicide resistance gene (552 bp) in the vector. The primer sequences are in Table S1.
